# Supplementary material for: Ge-alloyed kesterite thin-film solar cells: previous investigations and current status – a comprehensive review
Source: Royal Society of Chemistry journal article supplement (doi:10.1039/d3ta01218b), 2023-01-01
Supplement: d3ta01218b1.pdf [file d3ta01218b1.pdf]

## Supporting Information

### Ge-Alloyed Kesterite Thin-Film Solar Cells: Previous Investigations and Current Status - a Comprehensive Review

Romain Scaffidi\*, Gizem Birant, Guy Brammertz, Jessica de Wild, Denis Flandre, Bart Vermang

\*Corresponding author: [romain.scaffidi@imec.be](mailto:romain.scaffidi@imec.be), [romain.scaffidi@uclouvain.be](mailto:romain.scaffidi@uclouvain.be)

IMO, Hasselt University, Wetenschapspark 1, 3590 Diepenbeek, Belgium.

IMOMEC, imec, Wetenschapspark 1, 3590 Diepenbeek, Belgium.

EnergyVille 2, Thor Park 8320, 3600 Genk, Belgium.

ICTEAM, UCLouvain, Place du Levant 3/L5.03.02, 1348 Louvain-la-Neuve, Belgium.

| Reference             | x=         | y=       | $\eta$ | $V_{oc}$ ( $V_{oc,def}^{SQ}$ ) | $J_{sc}$ ( $J_{sc,def}^{SQ}$ ) | FF ( $FF_{def}^{SQ}$ ) | $E_g$ |
|-----------------------|------------|----------|--------|--------------------------------|--------------------------------|------------------------|-------|
|                       | Ge/(Ge+Sn) | S/(S+Se) | [%]    | [mV]                           | [mA/cm <sup>2</sup> ]          | [%]                    | [eV]  |
| Zhang 2020 [95]       | 0.002      | 0.00     | 10.5   | 424 (371)                      | 37.2 (8.5)                     | 66.9 (19.1)            | 1.05  |
| Neuschitzer 2018 [66] | 0.01       | 0.00     | 8.6    | 460 (344)                      | 29.3 (15.9)                    | 64.1 (22.1)            | 1.06  |
| Deng 2021 [112]       | 0.01       | 0.03     | 11.5   | 490 (323)                      | 34.8 (10.0)                    | 67.2 (19.1)            | 1.07  |
| Liu 2021 [72]         | 0.02       | 0.00     | 10.3   | 440 (383)                      | 34.7 (9.9)                     | 67.6 (18.8)            | 1.08  |
| S. Lee 2019 [123]     | 0.03       | 0.00     | 8.3    | 442 (353)                      | 31.7 (14.0)                    | 59.0 (27.0)            | 1.05  |
| Giraldo 2018 [63]     | 0.04       | 0.00     | 11.0   | 463 (332)                      | 36.0 (9.7)                     | 66.3 (19.7)            | 1.05  |
| Wang 2022 [30]        | 0.06       | 0.03     | 13.1   | 550 (292)                      | 34.3 (9.9)                     | 70.0 (16.6)            | 1.10  |
| Andres 2018 [71]      | 0.07       | 0.00     | 7.5    | 445 (340)                      | 31.0 (15.1)                    | 54.7 (31.2)            | 1.04  |
| Y. Sun 2017 [109]     | 0.08       | 0.10     | 9.1    | 410 (478)                      | 34.3 (8.14)                    | 64.7 (22.5)            | 1.15  |
| Khadka 2016 [83]      | 0.10       | 0.10     | 6.1    | 440 (430)                      | 32.3 (11.1)                    | 43.4 (43.6)            | 1.13  |
| Sanchez 2019 [79]     | 0.03       | 1.00     | 7.0    | 660 (555)                      | 18.7 (10.3)                    | 57.6 (32.3)            | 1.50  |
| Sun 2020 [101]        | 0.09       | 1.00     | 3.4    | 620 (670)                      | 12.4 (13.8)                    | 43.8 (46.6)            | 1.58  |
| Lim 2019 [78]         | 0.10       | 1.00     | 4.5    | 590 (541)                      | 15.5 (17.0)                    | 49.0 (40.3)            | 1.41  |
| Saini 2021 [77]       | 0.11       | 1.00     | 3.0    | 600 (690)                      | 11.7 (14.5)                    | 42.4 (48)              | 1.59  |
| Saini 2021 [77]       | 0.25       | 1.00     | 3.0    | 580 (776)                      | 10.1 (14.0)                    | 53.0 (37.7)            | 1.65  |
| Kim 2014 [100]        | 0.71       | 1.00     | 6.0    | 520 (920)                      | 23.3 (-1.9)                    | 49.6 (41.6)            | 1.74  |
| J. Li 2017 [80]       | 0.05       | 0.38     | 2.0    | 270 (739)                      | 22.4 (13.9)                    | 33.3 (55.1)            | 1.28  |
| L. Sun 2019 [81]      | 0.12       | 0.26     | 3.3    | 290 (691)                      | 26.4 (11.2)                    | 42.1 (46.0)            | 1.25  |
| Lokhande 2017 [86]    | 0.12       | 0.46     | 3.8    | 430 (495)                      | 18.3 (22.2)                    | 47.0 (40.6)            | 1.21  |
| Fu 2020 [111]         | 0.13       | 0.15     | 12.3   | 490 (295)                      | 37.1 (9.0)                     | 67.5 (18.4)            | 1.04  |

|                       |      |      |      |           |             |             |      |
|-----------------------|------|------|------|-----------|-------------|-------------|------|
| Lee 2021 [84]         | 0.15 | 0.10 | 7.9  | 450 (401) | 33.8 (10.3) | 52.0 (34.7) | 1.11 |
| Du 2018 [85]          | 0.14 | 0.02 | 8.1  | 400 (479) | 32.7 (10.2) | 62.5 (24.6) | 1.14 |
| S. Kim 2016 [126]     | 0.22 | 0.00 | 12.3 | 530 (321) | 32.2 (11.9) | 72.7 (14.0) | 1.11 |
| Collord 2016 [106]    | 0.25 | 0.00 | 11.0 | 583 (296) | 33.6 (9.3)  | 55.9 (31.2) | 1.14 |
| Nowak 2022 [73]       | 0.32 | 0.00 | 10.4 | 540 (413) | 36.0 (3.0)  | 54.0 (33.8) | 1.22 |
| Gao 2018 [110]        | 0.37 | 0.07 | 7.0  | 450 (420) | 29.3 (14.1) | 64.0 (23.0) | 1.13 |
| S. Kim 2016 [37]      | 0.39 | 0.00 | 10.0 | 540 (385) | 29.5 (11.0) | 62.7 (24.9) | 1.19 |
| Bag 2012 [94]         | 0.40 | 0.00 | 9.1  | 480 (408) | 31.8 (10.6) | 60.4 (26.8) | 1.15 |
| Guo 2012 [103]        | 0.17 | 0.50 | 8.3  | 470 (362) | 29.0 (15.4) | 61.8 (24.7) | 1.09 |
| Lv 2020 [113]         | 0.20 | 0.22 | 5.4  | 350 (650) | 34.6 (2.1)  | 38.0 (50.3) | 1.27 |
| Zhao 2016 [108]       | 0.30 | 0.16 | 4.8  | 390 (600) | 29.3 (7.8)  | 42.0 (46.2) | 1.26 |
| Hages 2015 [104]      | 0.30 | 0.50 | 9.4  | 460 (465) | 31.9 (8.6)  | 63.8 (23.8) | 1.19 |
| Punathil 2022 [114]   | 0.46 | 0.26 | 7.1  | 390 (741) | 33.0 (-0.5) | 55.0 (34.3) | 1.41 |
| Ruiz-Perona 2020 [41] | 0.52 | 0.00 | 6.4  | 510 (499) | 22.4 (13.9) | 56.3 (32.1) | 1.28 |
| Ruiz-Perona 2020 [42] | 0.61 | 0.00 | 5.6  | 500 (509) | 21.0 (15.3) | 53.2 (35.2) | 1.28 |
| Ford 2011 [29]        | 0.70 | 0.54 | 6.8  | 640 (482) | 21.5 (11.4) | 49.0 (40.3) | 1.40 |
| Choubrac 2020 [49]    | 1.00 | 0.00 | 8.5  | 625 (469) | 24.4 (9.6)  | 55.7 (33.4) | 1.37 |
| Schnabel 2017 [93]    | 1.00 | 0.27 | 2.2  | 670 (723) | 9.5 (13.2)  | 39.0 (51.9) | 1.69 |
| Schnabel 2017 [92]    | 1.00 | 0.31 | 6.0  | 620 (567) | 15.0 (14.6) | 52.0 (37.7) | 1.47 |
| Ruiz-Perona 2021 [43] | 1.00 | 0.39 | 2.8  | 790 (734) | 6.2 (12.6)  | 56.3 (35.2) | 1.83 |
| Ruiz-Perona 2021 [44] | 1.00 | 0.65 | 2.7  | 820 (844) | 6.4 (8.6)   | 51.0 (41.1) | 1.98 |
| Saini 2022 [58]       | 1.00 | 1.00 | 1.3  | 920 (950) | 3.2 (7.4)   | 45.0 (47.8) | 2.20 |

**Table S1.** Measured  $x=Ge/(Ge+Sn)$ ,  $y=S/(S+Se)$ , solar cell performance figures-of-merit and bandgap for the reported champion devices per composition point. This table is used to generate the composition maps of efficiency and Shockley-Queisser (SQ) deficits in Figure 8, using the same colors as the symbols of the 4 different composition groups (Group 1 Ge-doping and Se-rich in blue, Group 2 Ge-doping and S-rich in purple, Group 3 Ge-moderate and Se-rich in white and Group 4 Pure-Ge in orange). The first column is the author-year and reference number as used in the main text. The SQ deficits are indicated between brackets, the minus sign meaning a measured figure-of-merit greater than the corresponding SQ limit and thus not shown on the maps in Figure 8.
